# Supplementary material for: Towards standardisation of cell-free DNA measurement in plasma: controls for extraction efficiency, fragment size bias and quantification
Source: PubMed Central journal article supplement (PMC4182654; doi:10.1007/s00216-014-7835-3), 2014-05-24
Supplement: 216_2014_7835_MOESM1_ESM.pdf [file 216_2014_7835_MOESM1_ESM.pdf]

Analytical and Bioanalytical Chemistry

Electronic Supplementary Material

**Towards standardisation of cell-free DNA measurement in plasma:  
controls for extraction efficiency, fragment size bias and quantification**

Alison S. Devonshire, Alexandra S. Whale, Alice Gutteridge, Gerwyn Jones, Simon Cowen,  
Carole A. Foy, Jim F. Huggett

Fig. S1. Preparation of fragmented *ADH* plasmid

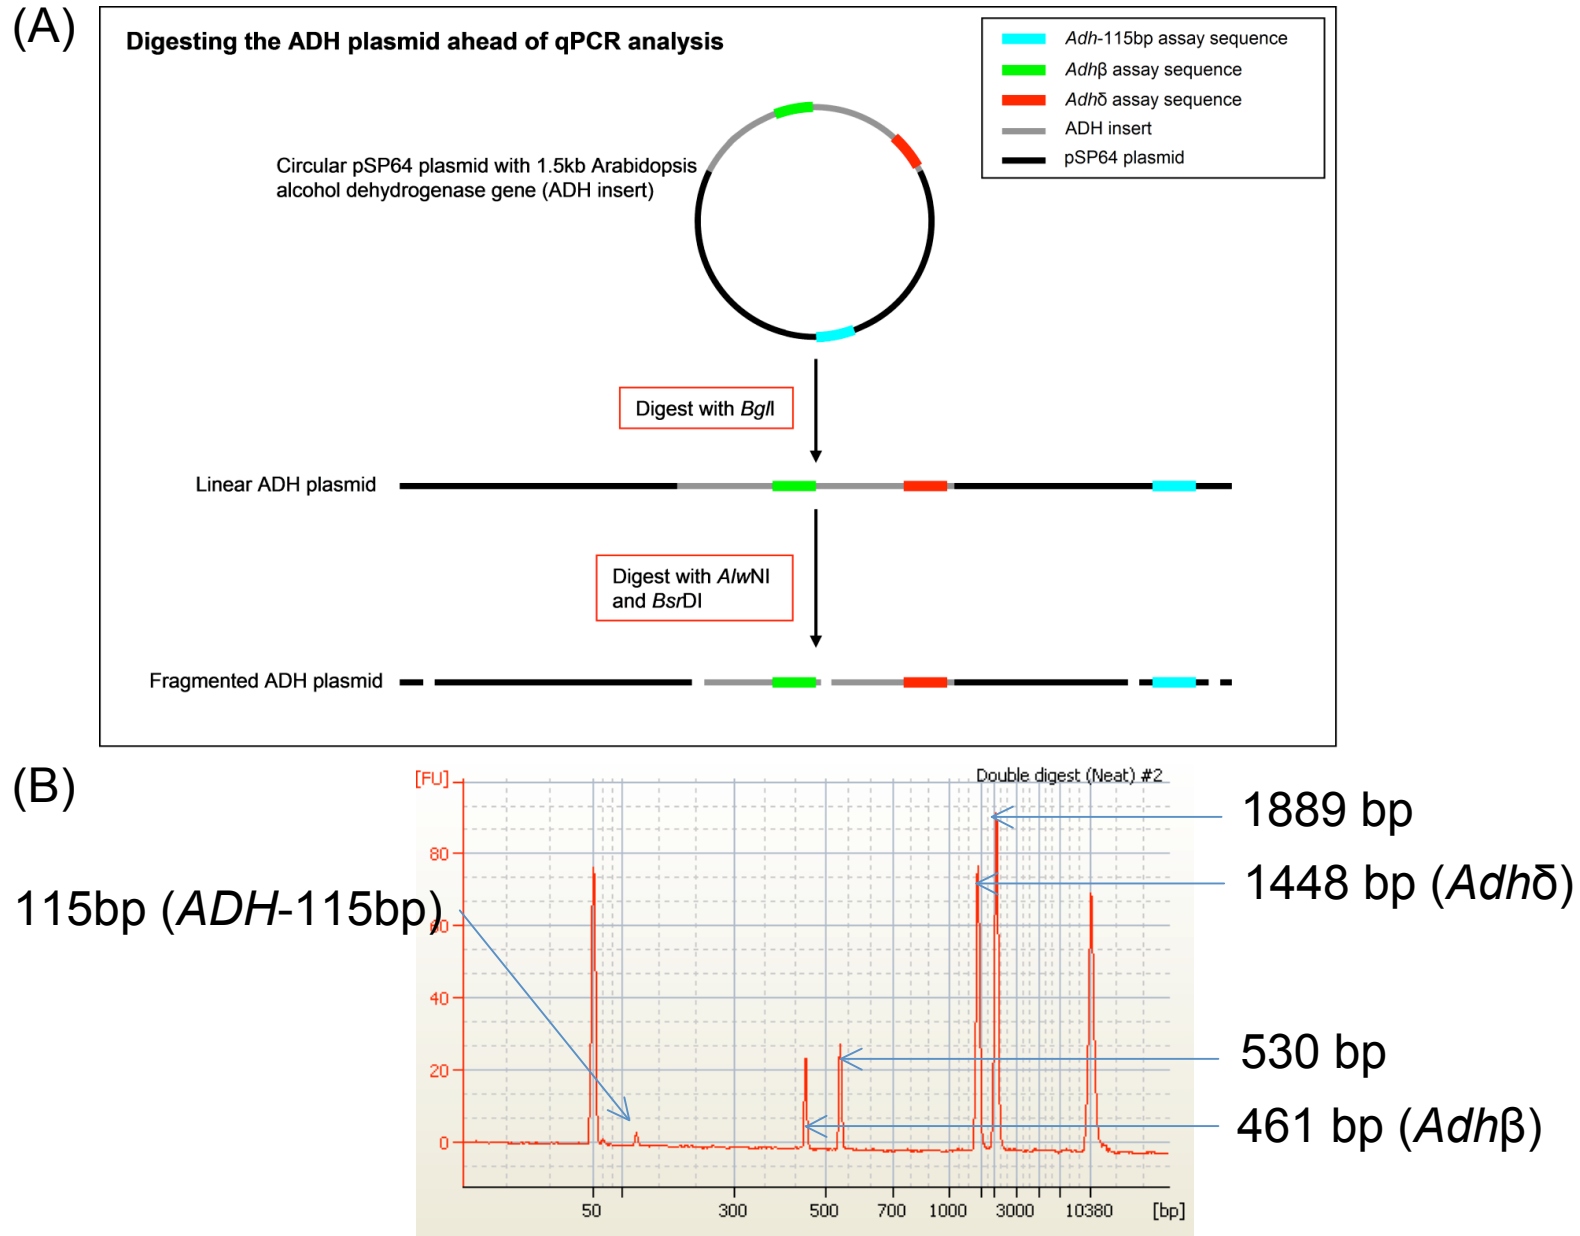

**Fig. S2.** Inhibition testing of cfDNA extracts from CNA, NS and FA kits

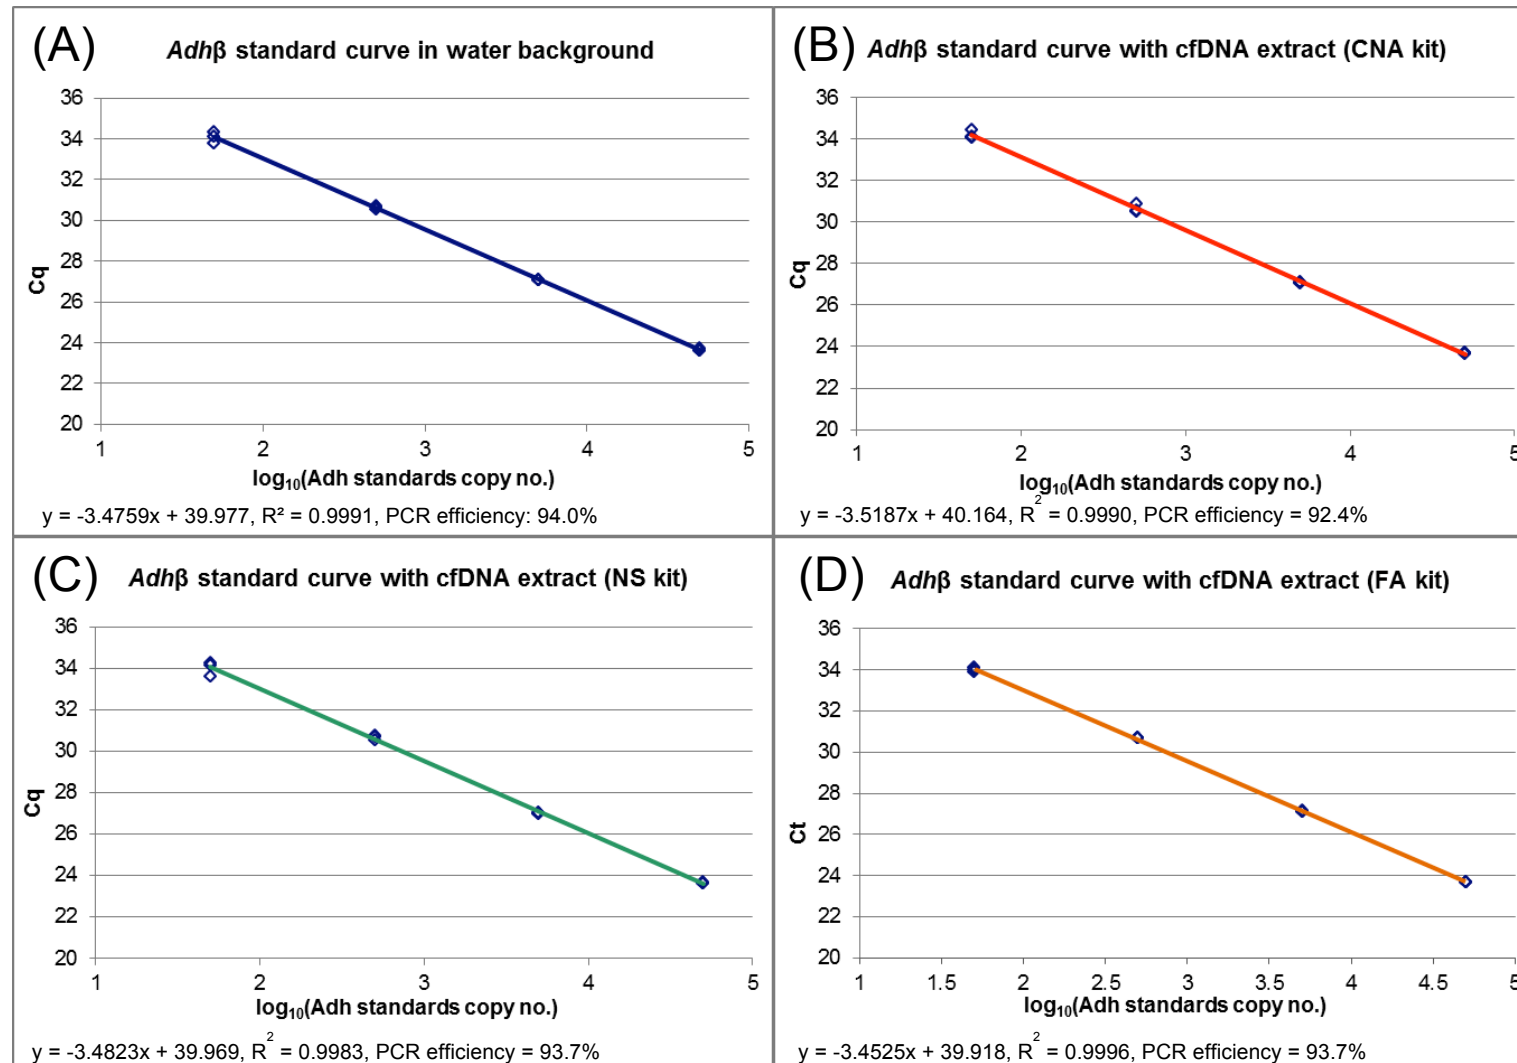

**Fig. S3.** cfDNA genomic copy numbers measured in extracts from 17 donors

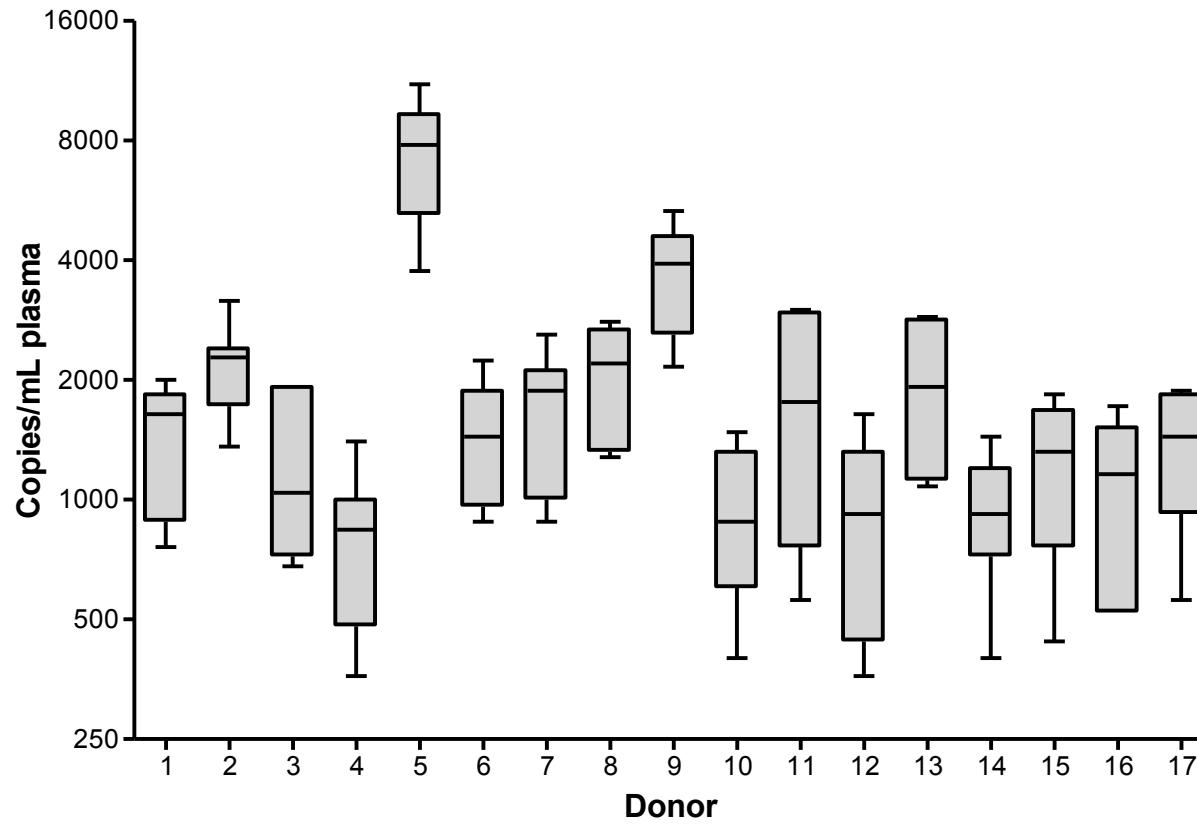

**Fig. S4.** Optimisation of droplet dPCR experiments

**(A) TERT**

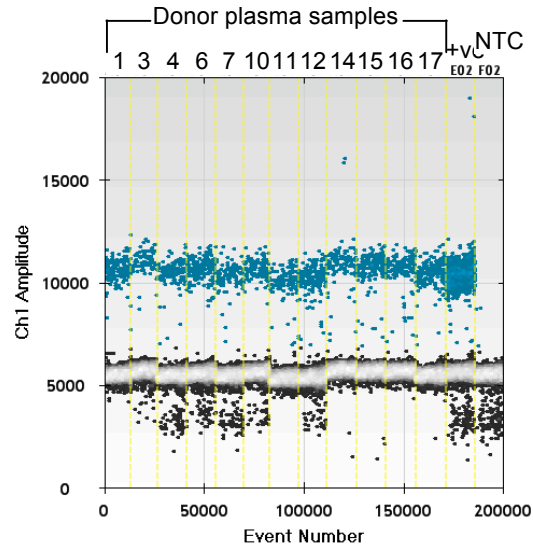

**(B) RPPH1**

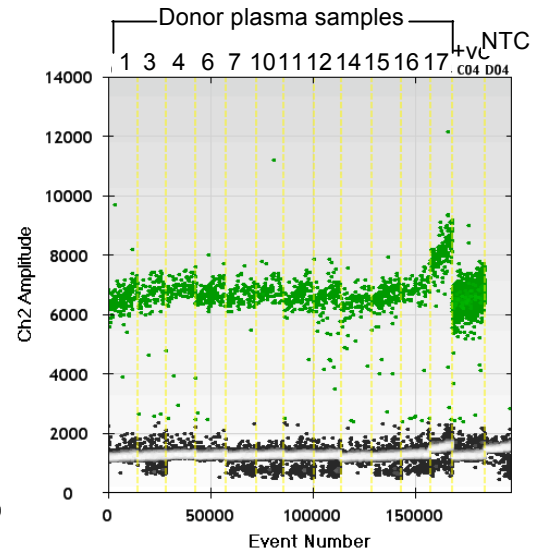

**(C) ERV-3**

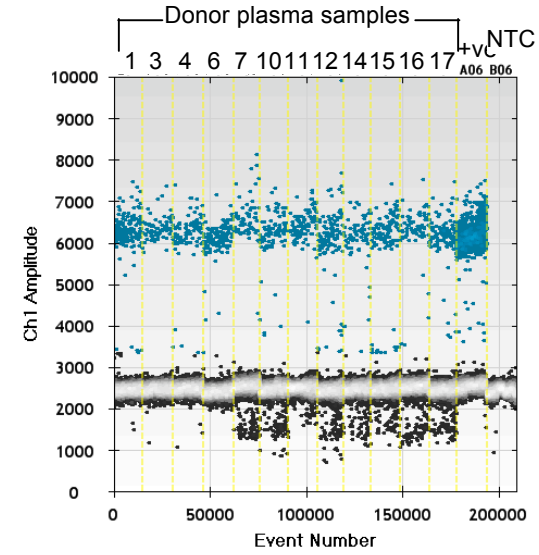

**Fig. S5.** Comparison of reference gene copy numbers measured by qPCR and droplet dPCR in cfDNA extracts from 12 plasma samples

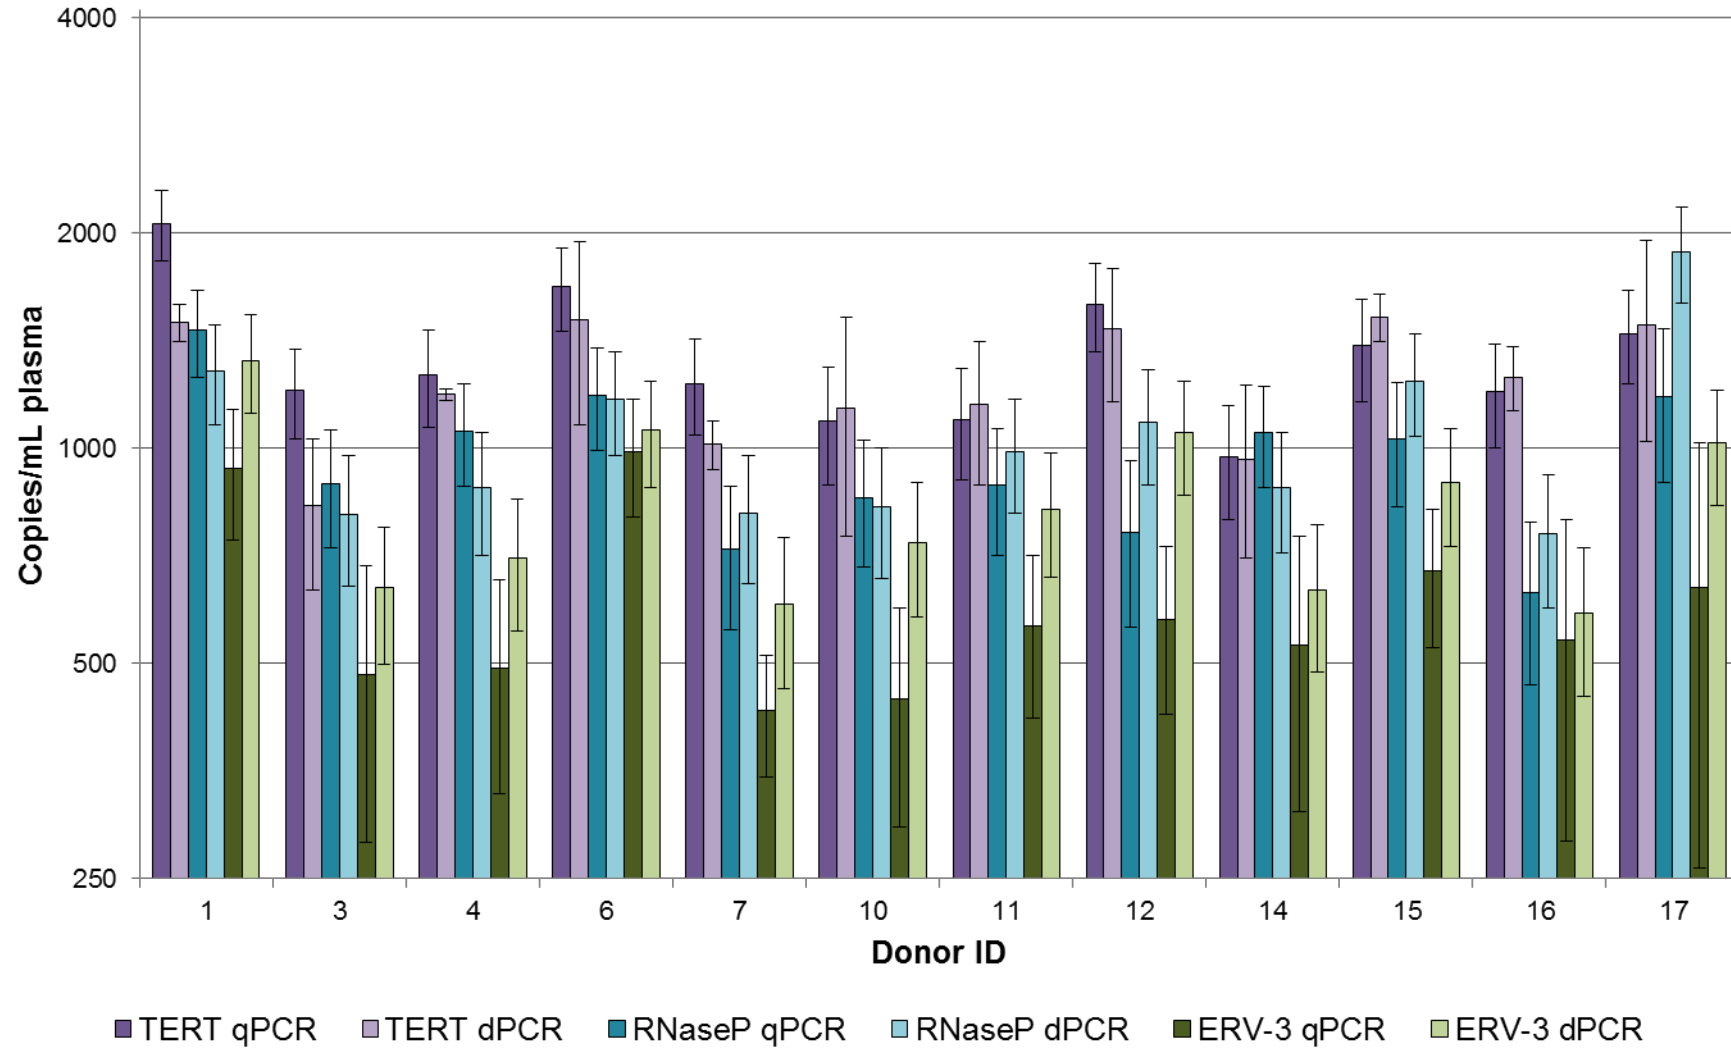

**Table S1.** Plasma sample information and composition of plasma pools

| Donor information |     |      | Plasma pool |        |   |
|-------------------|-----|------|-------------|--------|---|
| Number            | Age | Race | A (i)       | A (ii) | B |
| 1                 | 59  | C    | ✓           | ✓      |   |
| 2                 | 53  | B    | ✓           | ✓      |   |
| 3                 | 54  | B    | ✓           | ✓      |   |
| 4                 | 55  | H    | ✓           | ✓      |   |
| 5                 | 52  | B    | ✓           | ✓      |   |
| 6                 | 59  | B    |             |        | ✓ |
| 7                 | 50  | B    |             |        | ✓ |
| 8                 | 53  | B    |             |        | ✓ |
| 9                 | 51  | C    |             |        | ✓ |
| 10                | 50  | H    |             |        | ✓ |
| 11                | 50  | B    |             |        | ✓ |
| 12                | 53  | B    |             |        | ✓ |
| 13                | 54  | B    |             |        | ✓ |
| 14                | 52  | B    |             |        | ✓ |
| 15                | 53  | B    |             |        | ✓ |
| 16                | 54  | B    |             |        | ✓ |
| 17                | 50  | B    |             |        | ✓ |

Details of each donor are given with the relevant plasma pools. For the race key, C: Caucasian, B: Black and H: Hispanic.

**Table S2.** qPCR assay information

| Gene Symbol/ Assay name | Genome loci/ADH fragment size | Location                                      | Primer/probe sequence (5'-3')  | [Primer/probe] (µM) | Hydrolysis probe fluorophore /quencher | Commercial mastermix† | Amplicon length (bp) | Average efficiency ± SD* | R <sup>2</sup> * | Intra-assay repeatability SD Cq* | LOD (GE or plasmid copies as appropriate) | SD Cq (LOD) |
|-------------------------|-------------------------------|-----------------------------------------------|--------------------------------|---------------------|----------------------------------------|-----------------------|----------------------|--------------------------|------------------|----------------------------------|-------------------------------------------|-------------|
| <i>TERT</i>             | 5p15.33                       | NC_000005.9 (1253282..1295178, complement)    | F: CCTCACATAAATGCTACCAAACGA    | 0.9                 | FAM/BHQ1                               | Universal             | 79                   | 98.17% ± 2.36% (n=7)     | 0.994 (n=7)      | 0.13                             | 5                                         | 0.48        |
|                         |                               |                                               | R: TTCCAAGAAGGAGGCCATAGTC      | 0.9                 |                                        |                       |                      |                          |                  |                                  |                                           |             |
|                         |                               |                                               | P: AAGAAATGAACAGACCCATCCCCAGG  | 0.25                |                                        |                       |                      |                          |                  |                                  |                                           |             |
| <i>ALUJ</i>             | N/A                           | N/A                                           | F: CAACATAGTGAAACCCCGTCTCT     | 0.6                 | N/A                                    | Power SYBR            | N/A                  | 92.55% ± 1.81% (n=5)     | 0.998 (n=5)      | 0.18                             | ≤ 0.2                                     | 0.25        |
|                         |                               |                                               | R: GCCTCAGCCTCCCGAGTAG         | 0.6                 |                                        |                       |                      |                          |                  |                                  |                                           |             |
| <i>RPPH1</i>            | 14q11.2                       | NC_000014.8 (20811230..20811570, complement)  | F: GCGGAGGGAAGCTCATCAG         | 0.9                 | VIC/MGB                                | Universal             | 64                   | 96.07% ± 4.36% (n=5)     | 0.995 (n=5)      | 0.10                             | 5                                         | 0.24        |
|                         |                               |                                               | R: GGACATGGGAGTGAGTGACA        | 0.9                 |                                        |                       |                      |                          |                  |                                  |                                           |             |
|                         |                               |                                               | P: CACGAGCTGAGTGCG             | 0.2                 |                                        |                       |                      |                          |                  |                                  |                                           |             |
| <i>GAPDH</i>            | 12p13                         | NC_000012.11 (6643585..6647537)               | F: AGGTTTACATGTTCCAATATGATTCCA | 0.45                | FAM-BHQ1                               | Universal             | 94                   | 100.51% ± 6.94% (n=2)    | 0.996 (n=2)      | 0.10                             | 5                                         | 0.36        |
|                         |                               |                                               | R: ATGGGATTTCCATTGATGACAAG     | 0.45                |                                        |                       |                      |                          |                  |                                  |                                           |             |
|                         |                               |                                               | P: CCGTTCTCAGCCTTGACGGTGC      | 0.225               |                                        |                       |                      |                          |                  |                                  |                                           |             |
| <i>NAGK</i>             | 2p13.3                        | NC_000002.11 (71295408..71305998)             | F: TGGGCAGACACATCGTAGCA        | 0.2                 | FAM-BHQ1                               | Universal             | 66                   | 101.33% ± 2.99% (n=2)    | 0.989 (n=2)      | 0.17                             | 5                                         | 0.81        |
|                         |                               |                                               | R: CACCTTCACTCCCACCTCAAC       | 0.2                 |                                        |                       |                      |                          |                  |                                  |                                           |             |
|                         |                               |                                               | P: TGTGCCCCGAGATTGACCCGGT      | 0.1                 |                                        |                       |                      |                          |                  |                                  |                                           |             |
| <i>ERV-3</i>            | 7q11.2                        | NC_000007.13 (64450733..64467124, complement) | F: CATGGAAGCAAGGGAAGTAATG      | 0.2                 | FAM-BHQ1                               | Universal             | 135                  | 99.34% ± 4.85% (n=5)     | 0.994 (n=5)      | 0.16                             | 5                                         | 0.76        |
|                         |                               |                                               | R: CCCACGAGCAATACAGAATTT       | 0.2                 |                                        |                       |                      |                          |                  |                                  |                                           |             |
|                         |                               |                                               | P: TCTCCCTCGAACCTGCACCATCAA    | 0.15                |                                        |                       |                      |                          |                  |                                  |                                           |             |
| Valid Prime             | Proprietary                   | Proprietary                                   | Primer mix                     | 0.4                 | FAM-BHQ1                               | Universal             | Proprietary          | 91.57% ± 0.82% (n=2)     | 0.992 (n=2)      | 0.16                             | 5                                         | 0.61        |
|                         |                               |                                               | Probe solution                 | 0.2                 |                                        |                       |                      |                          |                  |                                  |                                           |             |
| <i>Adhβ</i>             | 461 bp                        | M12196                                        | F: TTGAGAGTGTTGGAGAAGGAGTGA    | 0.9                 | FAM/MGB                                | Universal             | 461                  | 95.65% ± 5.17% (n=4)     | 0.998 (n=4)      | 0.03                             | 50                                        | 0.21        |
|                         |                               |                                               | R: CGGTAAAGATCGGCAACACA        | 0.9                 |                                        |                       |                      |                          |                  |                                  |                                           |             |
|                         |                               |                                               | P: TCTTCAGCCAGGAGATC           | 0.2                 |                                        |                       |                      |                          |                  |                                  |                                           |             |
| <i>Adhδ</i>             | 1448 bp                       | M12196                                        | F: TGAACCCGAAAGACCATGACA       | 0.9                 | FAM/MGB                                | Universal             | 1448                 | 97.11% ± 2.62% (n=3)     | 0.998 (n=3)      | 0.12                             | 50                                        | 0.26        |
|                         |                               |                                               | R: CCCACCATCCGTCATCTCA         | 0.9                 |                                        |                       |                      |                          |                  |                                  |                                           |             |
|                         |                               |                                               | P: CCAATTCAACAGGTGATC          | 0.2                 |                                        |                       |                      |                          |                  |                                  |                                           |             |
| <i>ADH-115bp</i>        | 115 bp                        | M12196                                        | F: GGGCCGAGCGCAGAA             | 0.9                 | FAM/BHQ1                               | Gene Expression       | 115                  | 93.42% ± 2.09% (n=5)     | 0.996 (n=5)      | 0.13                             | 5                                         | 0.43        |
|                         |                               |                                               | R: ACTCTAGCTTCCC GGCAACA       | 0.9                 |                                        |                       |                      |                          |                  |                                  |                                           |             |
|                         |                               |                                               | P: TGGTCTGCAACTTTATCCGCCTCC    | 0.25                |                                        |                       |                      |                          |                  |                                  |                                           |             |

\*For assay optimisation, the number of replicate experiments (n) is given which were used to determine mean PCR efficiencies and R<sup>2</sup> values.

\*\*SD values given for 125 GE/reaction (human genomic targets), 1 GE/reaction (*ALUJ*) or 500 copies/reaction (*ADH* assays).

†PCR mastermixes (all Life Technologies): TaqMan® Universal PCR Master Mix (with AmpErase® UNG), Power SYBR® Green PCR Master Mix, TaqMan® Gene Expression Master Mix.



**Table S3. (A) MIQE checklist**

| ITEM TO CHECK                                                        | IMPORTANCE | CHECKLIST                                                     |
|----------------------------------------------------------------------|------------|---------------------------------------------------------------|
| <b>EXPERIMENTAL DESIGN</b>                                           |            |                                                               |
| Definition of experimental and control groups                        | E          | Materials & Methods and Table S1                              |
| Number within each group                                             | E          | Materials & Methods and Table S1                              |
| Assay carried out by core lab or investigator's lab?                 | D          | Investigator's lab                                            |
| Acknowledgement of authors' contributions                            | D          | Author information                                            |
| <b>SAMPLE</b>                                                        |            |                                                               |
| Description                                                          | E          | Materials & Methods and Table S1                              |
| Volume/mass of sample processed                                      | D          | Materials & Methods and Table S1                              |
| Microdissection or macrodissection                                   | E          | N/A                                                           |
| Processing procedure                                                 | E          | Materials & Methods                                           |
| If frozen - how and how quickly?                                     | E          | Materials & Methods                                           |
| If fixed - with what, how quickly?                                   | E          | N/A                                                           |
| Sample storage conditions and duration (especially for FFPE samples) | E          | Experiments performed within 6 months of sample receipt       |
| <b>NUCLEIC ACID EXTRACTION</b>                                       |            |                                                               |
| Procedure and/or instrumentation                                     | E          | Materials & Methods                                           |
| Name of kit and details of any modifications                         | E          | Materials & Methods                                           |
| Source of additional reagents used                                   | D          | N/A                                                           |
| Details of DNase or RNase treatment                                  | E          | No RNase/DNase treatment required                             |
| Contamination assessment (DNA or RNA)                                | E          | N/A                                                           |
| Nucleic acid quantification                                          | E          | qPCR/dPCR                                                     |
| Instrument and method                                                | E          | Materials & Methods                                           |
| Purity (A260/A280)                                                   | D          | N/A (concentration too low)                                   |
| Yield                                                                | D          | Results                                                       |
| RNA integrity method/instrument                                      | E          | N/A                                                           |
| RIN/RQI or Cq of 3' and 5' transcripts                               | E          | N/A                                                           |
| Electrophoresis traces                                               | D          | N/A                                                           |
| Inhibition testing (Cq dilutions, spike or other)                    | E          | ADH spike-in. See Materials & Methods, Figure 3 and Figure S2 |
| <b>REVERSE TRANSCRIPTION</b>                                         |            |                                                               |
| Complete reaction conditions                                         | E          | N/A                                                           |
| Amount of RNA and reaction volume                                    | E          | N/A                                                           |
| Priming oligonucleotide (if using GSP) and concentration             | E          | N/A                                                           |
| Reverse transcriptase and concentration                              | E          | N/A                                                           |
| Temperature and time                                                 | E          | N/A                                                           |
| Manufacturer of reagents and catalogue numbers                       | D          | N/A                                                           |
| Cqs with and without RT                                              | D*         | N/A                                                           |
| Storage conditions of cDNA                                           | D          | N/A                                                           |

Table S3. (A) MIQE checklist (cont.)

| <b>qPCR TARGET INFORMATION</b>                            |            |                                                                         |
|-----------------------------------------------------------|------------|-------------------------------------------------------------------------|
| If multiplex, efficiency and LOD of each assay.           | <b>E</b>   | N/A                                                                     |
| Sequence accession number                                 | <b>E</b>   | Table S2                                                                |
| Location of amplicon                                      | <b>D</b>   | Not included                                                            |
| Amplicon length                                           | <b>E</b>   | Table S2                                                                |
| <i>In silico</i> specificity screen (BLAST, etc)          | <b>E</b>   | NCBI PrimerBlast                                                        |
| Pseudogenes, retropseudogenes or other homologs?          | <b>D</b>   | N/D                                                                     |
| Sequence alignment                                        | <b>D</b>   | N/D                                                                     |
| Secondary structure analysis of amplicon                  | <b>D</b>   | N/D                                                                     |
| Location of each primer by exon or intron (if applicable) | <b>E</b>   | N/A (DNA)                                                               |
| What splice variants are targeted?                        | <b>E</b>   | N/A (DNA)                                                               |
| <b>qPCR OLIGONUCLEOTIDES</b>                              |            |                                                                         |
| Primer sequences                                          | <b>E</b>   | Table S2                                                                |
| RTPrimerDB Identification Number                          | <b>D</b>   | N/A                                                                     |
| Probe sequences                                           | <b>D**</b> | Table S2                                                                |
| Location and identity of any modifications                | <b>E</b>   | Table S2                                                                |
| Manufacturer of oligonucleotides                          | <b>D</b>   | Sigma Aldrich (excl. ValidPrime (TATAA Biocentre) and MGB probes (ABI)) |
| Purification method                                       | <b>D</b>   | HPLC                                                                    |
| <b>qPCR PROTOCOL</b>                                      |            |                                                                         |
| Complete reaction conditions                              | <b>E</b>   | Materials & Methods, Table S2                                           |
| Reaction volume and amount of cDNA/DNA                    | <b>E</b>   | Materials & Methods                                                     |
| Primer, (probe), Mg <sup>++</sup> and dNTP concentrations | <b>E</b>   | Table S2                                                                |
| Polymerase identity and concentration                     | <b>E</b>   | <i>Taq</i>                                                              |
| Buffer/kit identity and manufacturer                      | <b>E</b>   | Table S2                                                                |
| Exact chemical constitution of the buffer                 | <b>D</b>   | Proprietary                                                             |
| Additives (SYBR Green I, DMSO, etc.)                      | <b>E</b>   | No additives                                                            |
| Manufacturer of plates/tubes and catalog number           | <b>D</b>   | 96-well: 4306737 384-well: 4309849                                      |
| Complete thermocycling parameters                         | <b>E</b>   | Materials & Methods                                                     |
| Reaction setup (manual/robotic)                           | <b>D</b>   | Manual                                                                  |
| Manufacturer of qPCR instrument                           | <b>E</b>   | Materials & Methods                                                     |
| <b>qPCR VALIDATION</b>                                    |            |                                                                         |
| Evidence of optimisation (from gradients)                 | <b>D</b>   | Table S2                                                                |
| Specificity (gel, sequence, melt, or digest)              | <b>E</b>   | Melt curve analysis (SYBR Green)                                        |
| For SYBR Green I, C <sub>q</sub> of the NTC               | <b>E</b>   | Table S4                                                                |
| Standard curves with slope and y-intercept                | <b>E</b>   | Table S2                                                                |
| PCR efficiency calculated from slope                      | <b>E</b>   | Table S2                                                                |
| Confidence interval for PCR efficiency or standard error  | <b>D</b>   | N/D                                                                     |
| r <sup>2</sup> of standard curve                          | <b>E</b>   | Table S2                                                                |
| Linear dynamic range                                      | <b>E</b>   | Table S2                                                                |
| C <sub>q</sub> variation at lower limit                   | <b>E</b>   | Table S2                                                                |
| Confidence intervals throughout range                     | <b>D</b>   | N/D                                                                     |
| Evidence for limit of detection                           | <b>E</b>   | Standard curve                                                          |
| If multiplex, efficiency and LOD of each assay.           | <b>E</b>   | N/A                                                                     |

**Table S3. (A): MIQE checklist (cont.)**

| <b>DATA ANALYSIS</b>                                  |          |                                              |
|-------------------------------------------------------|----------|----------------------------------------------|
| qPCR analysis program (source, version)               | <b>E</b> | Materials & Methods                          |
| Cq method determination                               | <b>E</b> | Materials & Methods                          |
| Outlier identification and disposition                | <b>E</b> | Grubb's test                                 |
| Results of NTCs                                       | <b>E</b> | Table S4                                     |
| Justification of number and choice of reference genes | <b>E</b> | Results                                      |
| Description of normalisation method                   | <b>E</b> | Results                                      |
| Number and concordance of biological replicates       | <b>D</b> | N/A (no biological replicate plasma samples) |
| Number and stage (RT or qPCR) of technical replicates | <b>E</b> | Materials & Methods                          |
| Repeatability (intra-assay variation)                 | <b>E</b> | Table S2                                     |
| Reproducibility (inter-assay variation, %CV)          | <b>D</b> | Results                                      |
| Power analysis                                        | <b>D</b> | N/A                                          |
| Statistical methods for result significance           | <b>E</b> | Materials & Methods                          |
| Software (source, version)                            | <b>E</b> | Materials & Methods                          |
| Cq or raw data submission using RDML                  | <b>D</b> | N/D                                          |

MIQE checklist for authors, reviewers and editors. All essential information (E) must be submitted with the manuscript. Desirable information (D) should be submitted if available. If using primers obtained from RTPrimerDB, information on qPCR target, oligonucleotides, protocols and validation is available from that source.

\*Assessing the absence of DNA using a no RT assay is essential when first extracting RNA. Once the sample has been validated as RDNA-free, inclusion of a no-RT control is desirable, but no longer essential.

\*\*Disclosure of the probe sequence is highly desirable and strongly encouraged. However, since not all commercial pre-designed assay vendors provide this information, it cannot be an essential requirement. Use of such assays is advised against.

**Table S3. (B) dMIQE checklist**

| <b>ITEM TO CHECK</b>                                                           | <b>IMPORTANCE</b> | <b>CHECKLIST</b>                             |
|--------------------------------------------------------------------------------|-------------------|----------------------------------------------|
| <b>dPCR PROTOCOL</b>                                                           |                   |                                              |
| Complete reaction conditions                                                   | <b>E</b>          | Materials & Methods                          |
| Reaction volume and amount of cDNA/DNA                                         | <b>E</b>          | Materials & Methods                          |
| Primer, (probe), Mg <sup>++</sup> and dNTP concentrations                      | <b>E</b>          | Materials & Methods                          |
| Polymerase identity and concentration                                          | <b>E</b>          | Materials & Methods                          |
| Buffer/kit identity and manufacturer                                           | <b>E</b>          | Materials & Methods                          |
| Exact chemical constitution of the buffer                                      | <b>D</b>          | Proprietary                                  |
| Additives (SYBR Green I, DMSO, etc.)                                           | <b>E</b>          | No additives                                 |
| Plates/tubes catalogue number and manufacturer                                 | <b>D</b>          | Materials & Methods                          |
| Complete thermocycling parameters                                              | <b>E</b>          | Materials & Methods                          |
| Reaction setup (manual/robotic)                                                | <b>D</b>          | Manual                                       |
| Gravimetric or volumetric dilutions (manual/robotic)                           | <b>D</b>          | N/A                                          |
| Total PCR volume prepared                                                      | <b>D</b>          | Materials & Methods                          |
| Partition number                                                               | <b>E</b>          | Table S5                                     |
| Individual partition volume                                                    | <b>E</b>          | 0.91 nL according to manufacturer            |
| Total volume of the partitions measured (effective reaction size)              | <b>E</b>          | Table S5                                     |
| Partition volume variance/SD                                                   | <b>D</b>          | Unknown                                      |
| Comprehensive details and appropriate use of controls                          | <b>E</b>          | Materials & Methods                          |
| Manufacturer of dPCR instrument                                                | <b>E</b>          | Materials & Methods                          |
| <b>dPCR VALIDATION</b>                                                         |                   |                                              |
| Optimisation data for the assay                                                | <b>D</b>          | Table S2                                     |
| Specificity (when measuring rare mutations, pathogen sequences etc)            | <b>E</b>          | N/A                                          |
| Limit of detection of calibration control                                      | <b>D</b>          | N/A                                          |
| If multiplexing, comparison with singleplex assays                             | <b>E</b>          | N/A                                          |
| <b>DATA ANALYSIS</b>                                                           |                   |                                              |
| Mean copies per partition ( $\lambda$ or equivalent)                           | <b>E</b>          | Table S5                                     |
| dPCR analysis program (source, version)                                        | <b>E</b>          | Materials & Methods                          |
| Outlier identification and disposition                                         | <b>E</b>          | N/A                                          |
| Results of NTCs                                                                | <b>E</b>          | Table S5                                     |
| Examples of positive(s) and negative experimental results as supplemental data | <b>E</b>          | Supplementary Figure 4                       |
| Where appropriate, justification of number and choice of reference genes       | <b>E</b>          | Results                                      |
| Where appropriate, description of normalization method                         | <b>E</b>          | Results                                      |
| Number and concordance of biological replicates                                | <b>D</b>          | N/A (no biological replicate plasma samples) |
| Number and stage (RT or qPCR) of technical replicates                          | <b>E</b>          | Figure legends                               |
| Repeatability (intra-assay variation)                                          | <b>E</b>          | Table S2                                     |
| Reproducibility (inter-assay/user/lab etc variation)                           | <b>D</b>          | N/D                                          |
| Experimental variance or CI <sup>d</sup>                                       | <b>E</b>          | Table S5                                     |
| Statistical methods for analysis                                               | <b>E</b>          | Materials & Methods                          |
| Data submission using RDML (Real-time PCR Data Markup Language)                | <b>D</b>          | Table S5                                     |

dMIQE checklist for authors, reviewers and editors. All essential information (E) must be submitted with the manuscript. Desirable information (D) should be submitted if possible.

Due to the overlap with the MIQE guidelines (Table S3A), items to check under Experimental Design, Sample, Nucleic Acid Extraction, Target Information and Oligonucleotides have been omitted from this table but are part of the dMIQE guidelines.

<sup>d</sup> When single dPCR experiments are performed, the variation due to counting error alone should be calculated from the Binomial (or suitable equivalent) distribution.

**Table S4.** Cq values of NTCs

| <b>Figure</b> | <b>Assay</b>          | <b>Cq value</b> | <b>Internal reference</b> |
|---------------|-----------------------|-----------------|---------------------------|
| Figure 1      | ALUJ                  | 29.81           | Exp015                    |
| Figure 1      | ALUJ                  | 29.75           | Exp015                    |
| Figure 1      | ALUJ                  | 29.63           | Exp015                    |
| Figure 1      | TERT                  | Undetermined    | Exp015                    |
| Figure 1      | TERT                  | Undetermined    | Exp015                    |
| Figure 1      | TERT                  | Undetermined    | Exp015                    |
| Figure 2      | Adh $\beta$ (Taqman)  | Undetermined    | Exp010c                   |
| Figure 2      | Adh $\beta$ (Taqman)  | Undetermined    | Exp010c                   |
| Figure 2      | Adh $\delta$ (Taqman) | Undetermined    | Exp010c                   |
| Figure 2      | Adh $\delta$ (Taqman) | Undetermined    | Exp010c                   |
| Figure 2      | ADH plasmid 115 bp    | 37.02           | Exp010c repeat            |
| Figure 2      | ADH plasmid 115 bp    | Undetermined    | Exp010c repeat            |
| Figure 2      | ADH plasmid 115 bp    | 36.99           | Exp010c repeat            |
| Figure 3      | Adh $\beta$ (Taqman)  | Undetermined    | Exp12                     |
| Figure 3      | Adh $\beta$ (Taqman)  | Undetermined    | Exp12                     |
| Figure 3      | Adh $\beta$ (Taqman)  | Undetermined    | Exp12                     |
| Figure 3      | Adh $\beta$ (SYBR)    | Undetermined    | Exp12                     |
| Figure 3      | Adh $\beta$ (SYBR)    | 37.45           | Exp12                     |
| Figure 3      | Adh $\beta$ (SYBR)    | Undetermined    | Exp12                     |
| Figure 4      | TERT                  | Undetermined    | Exp29a                    |
| Figure 4      | TERT                  | Undetermined    | Exp29a                    |
| Figure 4      | TERT                  | Undetermined    | Exp29a                    |
| Figure 5      | TERT                  | Undetermined    | Exp22                     |
| Figure 5      | TERT                  | Undetermined    | Exp22                     |
| Figure 5      | TERT                  | Undetermined    | Exp22                     |
| Figure 5      | ALUJ                  | 27.73           | Exp22                     |
| Figure 5      | ALUJ                  | 28.15           | Exp22                     |
| Figure 5      | ALUJ                  | 27.86           | Exp22                     |
| Figure 5      | RPPH1                 | Undetermined    | Exp22                     |
| Figure 5      | RPPH1                 | Undetermined    | Exp22                     |
| Figure 5      | RPPH1                 | Undetermined    | Exp22                     |
| Figure 5      | GAPDH                 | Undetermined    | Exp22                     |
| Figure 5      | GAPDH                 | Undetermined    | Exp22                     |
| Figure 5      | GAPDH                 | Undetermined    | Exp22                     |
| Figure 5      | NAGK                  | Undetermined    | Exp22                     |
| Figure 5      | NAGK                  | Undetermined    | Exp22                     |
| Figure 5      | NAGK                  | Undetermined    | Exp22                     |
| Figure 5      | ERV-3                 | Undetermined    | Exp22                     |
| Figure 5      | ERV-3                 | Undetermined    | Exp22                     |
| Figure 5      | ERV-3                 | Undetermined    | Exp22                     |
| Figure 5      | Valid Prime           | Undetermined    | Exp22                     |
| Figure 5      | Valid Prime           | Undetermined    | Exp22                     |
| Figure 5      | Valid Prime           | Undetermined    | Exp22                     |

**Table S4.** Cq values of NTCs (cont.)

| <b>Figure</b> | <b>Assay</b> | <b>Cq value</b> | <b>Internal reference</b> |
|---------------|--------------|-----------------|---------------------------|
| Figures 6&7   | TERT         | Undetermined    | Exp025a                   |
| Figures 6&7   | TERT         | Undetermined    | Exp025b                   |
| Figures 6&7   | TERT         | Undetermined    | Exp025c                   |
| Figures 6&7   | ALU J        | 29.96           | Exp025a                   |
| Figures 6&7   | ALU J        | 29.87           | Exp025b                   |
| Figures 6&7   | ALU J        | 30.18           | Exp025c                   |
| Figures 6&7   | RPPH1        | Undetermined    | Exp025a                   |
| Figures 6&7   | RPPH1        | Undetermined    | Exp025b                   |
| Figures 6&7   | RPPH1        | Undetermined    | Exp025c                   |
| Figures 6&7   | ERV-3        | Undetermined    | Exp025a                   |
| Figures 6&7   | ERV-3        | Undetermined    | Exp025b                   |
| Figures 6&7   | ERV-3        | Undetermined    | Exp025c                   |

**Table S5.** Droplet dPCR data

| Plasma sample | Assay | Positive partitions | Number of partitions | Total volume of partitions ( $\mu\text{L}$ ) | $\lambda$ | Quant. (c/ $\mu\text{L}$ ) | 95% CI-L (c/ $\mu\text{L}$ ) | 95% CI-H (c/ $\mu\text{L}$ ) |
|---------------|-------|---------------------|----------------------|----------------------------------------------|-----------|----------------------------|------------------------------|------------------------------|
| 1             | TERT  | 161                 | 13563                | 12.34                                        | 0.01      | 74.99                      | 63.41                        | 86.58                        |
| 3             | TERT  | 88                  | 13326                | 12.13                                        | 0.01      | 41.60                      | 32.92                        | 50.30                        |
| 4             | TERT  | 139                 | 14749                | 13.42                                        | 0.01      | 59.46                      | 49.58                        | 69.35                        |
| 6             | TERT  | 175                 | 14629                | 13.31                                        | 0.01      | 75.57                      | 64.38                        | 86.78                        |
| 7             | TERT  | 110                 | 13694                | 12.46                                        | 0.01      | 50.64                      | 41.19                        | 60.12                        |
| 10            | TERT  | 119                 | 13186                | 12.00                                        | 0.01      | 56.93                      | 46.71                        | 67.16                        |
| 11            | TERT  | 131                 | 14373                | 13.08                                        | 0.01      | 57.50                      | 47.66                        | 67.35                        |
| 12            | TERT  | 166                 | 14253                | 12.97                                        | 0.01      | 73.56                      | 62.38                        | 84.76                        |
| 14            | TERT  | 114                 | 14918                | 13.58                                        | 0.01      | 48.17                      | 39.33                        | 57.02                        |
| 15            | TERT  | 174                 | 14404                | 13.11                                        | 0.01      | 76.32                      | 64.99                        | 87.67                        |
| 16            | TERT  | 151                 | 15174                | 13.81                                        | 0.01      | 62.80                      | 52.79                        | 72.83                        |
| 17            | TERT  | 180                 | 15306                | 13.93                                        | 0.01      | 74.28                      | 63.44                        | 85.15                        |
| NTC           | TERT  | 3                   | 13907                | 12.66                                        | 0.00      | 1.35                       | -0.18                        | 2.89                         |
| 1             | RPPH1 | 152                 | 14950                | 13.60                                        | 0.01      | 64.17                      | 53.98                        | 74.38                        |
| 3             | RPPH1 | 89                  | 13875                | 12.63                                        | 0.01      | 40.41                      | 32.02                        | 48.81                        |
| 4             | RPPH1 | 99                  | 14177                | 12.90                                        | 0.01      | 44.00                      | 35.34                        | 52.68                        |
| 6             | RPPH1 | 139                 | 15001                | 13.65                                        | 0.01      | 58.46                      | 48.75                        | 68.18                        |
| 7             | RPPH1 | 94                  | 14605                | 13.29                                        | 0.01      | 40.55                      | 32.35                        | 48.75                        |
| 10            | RPPH1 | 89                  | 13536                | 12.32                                        | 0.01      | 41.42                      | 32.82                        | 50.04                        |
| 11            | RPPH1 | 117                 | 14901                | 13.56                                        | 0.01      | 49.50                      | 40.54                        | 58.48                        |
| 12            | RPPH1 | 114                 | 13220                | 12.03                                        | 0.01      | 54.38                      | 44.41                        | 64.38                        |
| 14            | RPPH1 | 104                 | 14847                | 13.51                                        | 0.01      | 44.14                      | 35.66                        | 52.63                        |
| 15            | RPPH1 | 144                 | 14637                | 13.32                                        | 0.01      | 62.08                      | 51.95                        | 72.23                        |
| 16            | RPPH1 | 85                  | 14126                | 12.85                                        | 0.01      | 37.90                      | 29.85                        | 45.96                        |
| 17            | RPPH1 | 163                 | 10956                | 9.97                                         | 0.01      | 94.13                      | 79.69                        | 108.59                       |
| NTC           | RPPH1 | 1                   | 12470                | 11.35                                        | 0.00      | 0.50                       | -0.48                        | 1.49                         |
| 1             | ERV-3 | 157                 | 14926                | 13.58                                        | 0.01      | 66.40                      | 56.02                        | 76.80                        |
| 3             | ERV-3 | 81                  | 15998                | 14.56                                        | 0.01      | 31.87                      | 24.94                        | 38.82                        |
| 4             | ERV-3 | 88                  | 15781                | 14.36                                        | 0.01      | 35.11                      | 27.78                        | 42.46                        |
| 6             | ERV-3 | 132                 | 15698                | 14.29                                        | 0.01      | 53.03                      | 43.99                        | 62.08                        |
| 7             | ERV-3 | 67                  | 13938                | 12.68                                        | 0.00      | 30.26                      | 23.02                        | 37.51                        |
| 10            | ERV-3 | 85                  | 14515                | 13.21                                        | 0.01      | 36.88                      | 29.04                        | 44.73                        |
| 11            | ERV-3 | 99                  | 15172                | 13.81                                        | 0.01      | 41.11                      | 33.02                        | 49.21                        |
| 12            | ERV-3 | 116                 | 13917                | 12.66                                        | 0.01      | 52.56                      | 43.00                        | 62.13                        |
| 14            | ERV-3 | 71                  | 14091                | 12.82                                        | 0.01      | 31.72                      | 24.35                        | 39.10                        |
| 15            | ERV-3 | 108                 | 15187                | 13.82                                        | 0.01      | 44.81                      | 36.37                        | 53.27                        |
| 16            | ERV-3 | 70                  | 14989                | 13.64                                        | 0.00      | 29.39                      | 22.51                        | 36.28                        |
| 17            | ERV-3 | 114                 | 14120                | 12.85                                        | 0.01      | 50.90                      | 41.57                        | 60.26                        |
| NTC           | ERV-3 | 0                   | 15377                | 13.99                                        | 0.00      | 0.00                       | 0.00                         | 0.00                         |



**Table S6.** Comparison of kits for cfDNA extraction: % Coefficients of variation

| <b>Target</b>       | <b>Assay</b> | <b>Kit</b> |           |            |
|---------------------|--------------|------------|-----------|------------|
|                     |              | <b>CNA</b> | <b>NS</b> | <b>DBM</b> |
| Endogenous          | <i>TERT</i>  | 12%        | 47%       | 10%        |
| Endogenous          | <i>ALUJ</i>  | 12%        | 46%       | 23%        |
| <i>ADH</i> spike-in | 1448 bp      | 12%        | 58%       | 2%         |
| <i>ADH</i> spike-in | 461 bp       | 4%         | 55%       | 11%        |
| <i>ADH</i> spike-in | 115 bp       | 8%         | 40%       | 5%         |
| Mean                | All          | 10%        | 49%       | 10%        |

**Table S7.** Correlation analysis of reference gene assays

Copy number values for each donor QX1-QX17 (Figure 5) were log10 transformed. Results of Pearson pairwise correlation analysis (r and p values) are displayed below).

R-values

| Assay | ALUJ  | ERV3  | GAPDH | NAGK  | RPPH1 | TERT  | VP    |
|-------|-------|-------|-------|-------|-------|-------|-------|
| ALUJ  |       | 0.900 | 0.946 | 0.910 | 0.896 | 0.952 | 0.861 |
| ERV3  | 0.900 |       | 0.950 | 0.919 | 0.890 | 0.922 | 0.910 |
| GAPDH | 0.946 | 0.950 |       | 0.929 | 0.904 | 0.938 | 0.907 |
| NAGK  | 0.910 | 0.919 | 0.929 |       | 0.888 | 0.910 | 0.931 |
| RPPH1 | 0.896 | 0.890 | 0.904 | 0.888 |       | 0.966 | 0.860 |
| TERT  | 0.952 | 0.922 | 0.938 | 0.910 | 0.966 |       | 0.894 |
| VP    | 0.861 | 0.910 | 0.907 | 0.931 | 0.860 | 0.894 |       |

p-values

|              | ALUJ        | ERV3        | GAPDH       | NAGK        | RPPH1       | TERT        | VP          |
|--------------|-------------|-------------|-------------|-------------|-------------|-------------|-------------|
| <b>ALUJ</b>  |             | 8.52467E-07 | 9.95E-09    | 3.95E-07    | 1.18241E-06 | 4.28E-09    | 9.21302E-06 |
| <b>ERV3</b>  | 8.52467E-07 |             | 5.96E-09    | 1.92E-07    | 1.73279E-06 | 1.45E-07    | 4.10E-07    |
| <b>GAPDH</b> | 9.95E-09    | 5.96E-09    |             | 7.08E-08    | 6.49888E-07 | 2.64E-08    | 5.08022E-07 |
| <b>NAGK</b>  | 3.95E-07    | 1.92E-07    | 7.08E-08    |             | 2.00408E-06 | 4.04E-07    | 5.99E-08    |
| <b>RPPH1</b> | 1.18241E-06 | 1.73279E-06 | 6.49888E-07 | 2.00408E-06 |             | 3.44E-10    | 9.38501E-06 |
| <b>TERT</b>  | 4.28E-09    | 1.45E-07    | 2.64E-08    | 4.04E-07    | 3.44E-10    |             | 1.33382E-06 |
| <b>VP</b>    | 9.21302E-06 | 4.10E-07    | 5.08022E-07 | 5.99E-08    | 9.38501E-06 | 1.33382E-06 |             |

**Table S8.** GeNorm analysis of 7 reference genes in 17 donor samples

Input: Copy numbers

| Gene Name | M-Value<br>(smallest value,<br>most stable) |
|-----------|---------------------------------------------|
| ERV-3     | 0.390                                       |
| RPHH1     | 0.368                                       |
| VP        | 0.338                                       |
| NAGK      | 0.316                                       |
| TERT      | 0.295                                       |
| GAPDH     | 0.293                                       |
| ALU J     | 0.293                                       |

## Supplementary Methods (Statistical analysis)

### Ranking of copy number measurements according to reference gene

A log transform of the data expressed as cfDNA genomic copies/mL plasma was used to produce a residual distribution closer to Normal. Classical linear models were used to estimate coefficients and significance of terms. The significance of estimated differences between the reference genes was assessed using Tukey's Honest Significant Differences (HSD) test, and the results used to construct a rank order.

### Figure 5 data (Internal reference: Experiment 22)

The Tukey HSD plot is given in Appendix A (Figure 1). This shows confidence intervals based on multiple testing for the differences between the different factor levels (in this case the 7 reference genes in the set – a total of 21 comparisons). Confidence intervals which include zero are indicative of no significant difference between a pair of Markers, and by examining the plot as a whole, it is possible to derive a rank order in terms of the observed copy number (high to low):

1. TERT, AluJ
3. NAGK, GAPDH
5. RPPH1 (RNaseP)
6. ERV3, VP (ValidPrime)

This order is consistent with the calculated differences, which are also given in Appendix B. The difference between RPPH1 and NAGK, GAPDH is very borderline ( $0.04 < p < 0.05$ ).

### Figure 6-7 qPCR data (Internal reference: Experiment 25)

This was carried out for 4 reference genes over 3 runs in a balanced experiment. One data point was found to be missing, but this is not expected to affect the estimates appreciably.

All but one of the comparisons showed differences which were strongly significantly different from zero (

Supplementary **Methods Appendix A: Figures (continued)**

Figure 2). This resulted in a rank order as follows:

1. TERT, AluJ
3. RPPH1
4. ERV3

**Figure 6 ddPCR data (Internal reference: Experiment 32)**

Figure 3 shows the differences, which produces the following rank order:

- 1 TERT
- 2 RPPH1
- 3 ERV3

The difference between TERT and RPPH1 is very borderline ( $p = 0.050$ ).

Supplementary **Methods Appendix A: Figures**

**Figure 1: Tukey's HSD plot for Experiment 22, showing differences between the reference genes (95% family-wise confidence level). There are 21 pairwise comparisons between the 7 in the set.**

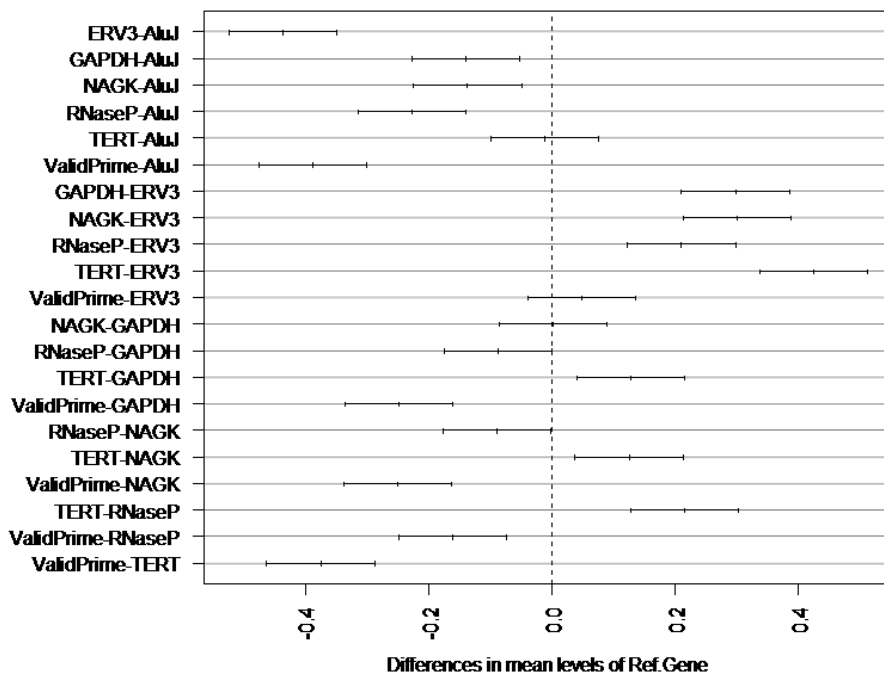

Figure 2: As for Figure 1, for Experiment 25.

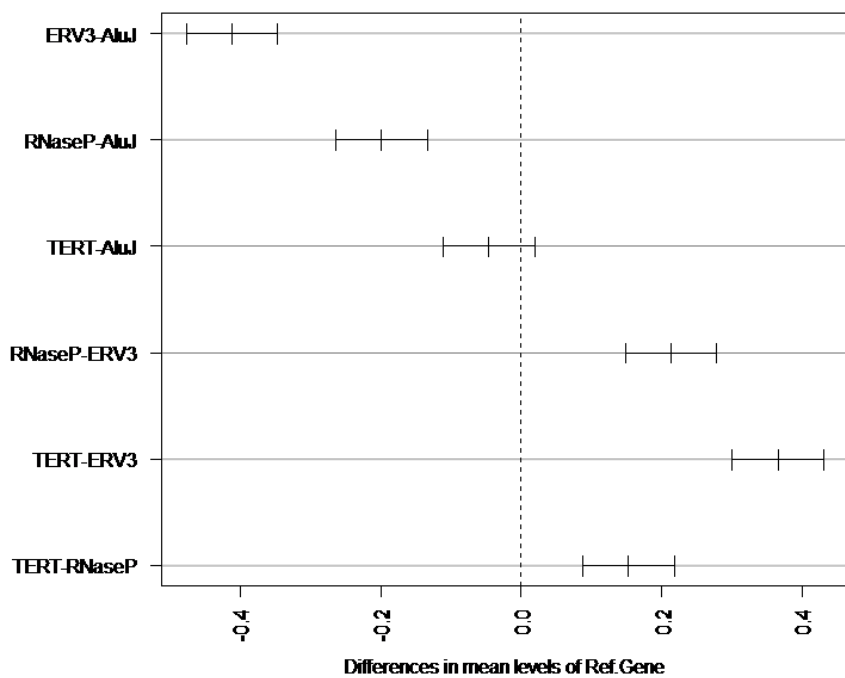

Figure 3: As for Figure 1, for Experiment 32.

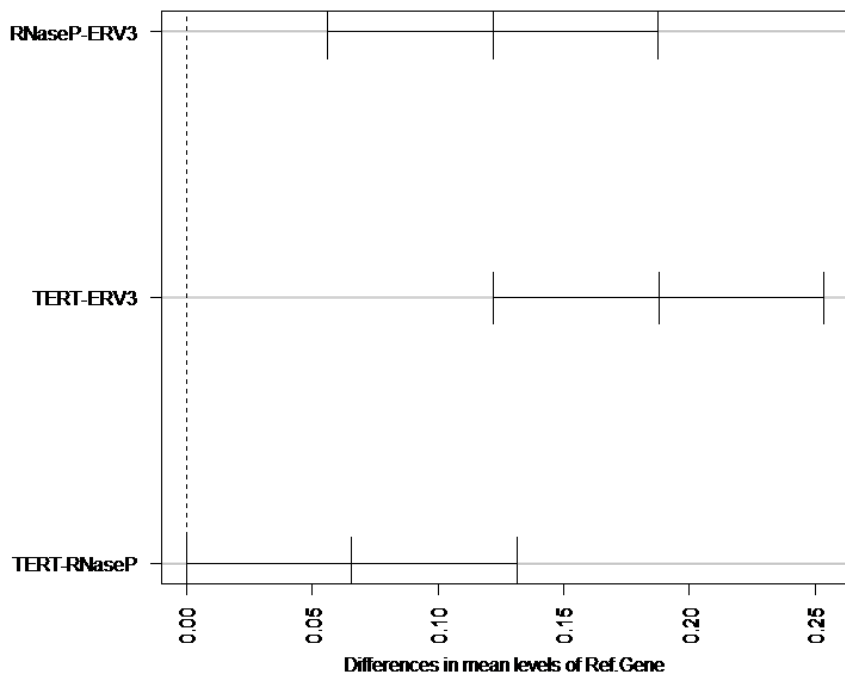

## Supplementary Methods Appendix B – Model output

### Experiment 22

#### Summary:

Call:

```
lm(formula = log10(Copies) ~ Ref.Gene + Donor - 1, data = exp22)
```

#### Residuals:

| Min       | 1Q        | Median   | 3Q       | Max      |
|-----------|-----------|----------|----------|----------|
| -0.178250 | -0.049013 | 0.002288 | 0.051177 | 0.172693 |

#### Coefficients:

|                    | Estimate | Std. Error | t value | Pr(> t ) |     |
|--------------------|----------|------------|---------|----------|-----|
| Ref.GeneAluJ       | 3.30972  | 0.03723    | 88.904  | < 2e-16  | *** |
| Ref.GeneERV3       | 2.87288  | 0.03723    | 77.170  | < 2e-16  | *** |
| Ref.GeneGAPDH      | 3.17036  | 0.03723    | 85.160  | < 2e-16  | *** |
| Ref.GeneNAGK       | 3.17245  | 0.03723    | 85.217  | < 2e-16  | *** |
| Ref.GeneRPPH1      | 3.08283  | 0.03723    | 82.809  | < 2e-16  | *** |
| Ref.GeneTERT       | 3.29724  | 0.03723    | 88.569  | < 2e-16  | *** |
| Ref.GeneValidPrime | 2.92154  | 0.03723    | 78.477  | < 2e-16  | *** |
| DonorQX10          | -0.19880 | 0.04526    | -4.392  | 2.89e-05 | *** |
| DonorQX11          | 0.05433  | 0.04526    | 1.200   | 0.23296  |     |
| DonorQX12          | -0.19159 | 0.04526    | -4.233  | 5.28e-05 | *** |
| DonorQX13          | 0.14500  | 0.04526    | 3.203   | 0.00184  | **  |
| DonorQX14          | -0.17963 | 0.04526    | -3.968  | 0.00014  | *** |
| DonorQX15          | -0.08531 | 0.04526    | -1.885  | 0.06250  | .   |
| DonorQX16          | -0.14358 | 0.04526    | -3.172  | 0.00203  | **  |
| DonorQX17          | -0.03401 | 0.04526    | -0.751  | 0.45431  |     |
| DonorQX2           | 0.21438  | 0.04526    | 4.736   | 7.52e-06 | *** |
| DonorQX3           | -0.07879 | 0.04526    | -1.741  | 0.08493  | .   |
| DonorQX4           | -0.25282 | 0.04526    | -5.586  | 2.17e-07 | *** |
| DonorQX5           | 0.73043  | 0.04526    | 16.137  | < 2e-16  | *** |
| DonorQX6           | 0.03416  | 0.04526    | 0.755   | 0.45223  |     |
| DonorQX7           | 0.07021  | 0.04526    | 1.551   | 0.12416  |     |
| DonorQX8           | 0.16940  | 0.04526    | 3.742   | 0.00031  | *** |
| DonorQX9           | 0.44237  | 0.04526    | 9.773   | 4.57e-16 | *** |

---

Signif. codes: 0 '\*\*\*' 0.001 '\*\*' 0.01 '\*' 0.05 '.' 0.1 ' ' 1

Residual standard error: 0.08468 on 96 degrees of freedom

Multiple R-squared: 0.9994, Adjusted R-squared: 0.9993

F-statistic: 7262 on 23 and 96 DF, p-value: < 2.2e-16

Analysis of variance:

Analysis of Variance Table

Response: log10(Copies)

|           | Df | Sum Sq  | Mean Sq | F value   | Pr(>F)        |
|-----------|----|---------|---------|-----------|---------------|
| Ref.Gene  | 7  | 1190.56 | 170.079 | 23718.697 | < 2.2e-16 *** |
| Donor     | 16 | 7.09    | 0.443   | 61.814    | < 2.2e-16 *** |
| Residuals | 96 | 0.69    | 0.007   |           |               |

---

Signif. codes: 0 '\*\*\*' 0.001 '\*\*' 0.01 '\*' 0.05 '.' 0.1 ' ' 1

Tukey HSD:

Tukey multiple comparisons of means  
95% family-wise confidence level

Fit: aov(formula = log10(Copies) ~ Ref.Gene + Donor, data = exp22)

\$Ref.Gene

|                   | diff         | lwr         | upr           | p adj     |
|-------------------|--------------|-------------|---------------|-----------|
| ERV3-AluJ         | -0.436843187 | -0.52432018 | -3.493662e-01 | 0.0000000 |
| GAPDH-AluJ        | -0.139367730 | -0.22684473 | -5.189073e-02 | 0.0001169 |
| NAGK-AluJ         | -0.137272422 | -0.22474942 | -4.979543e-02 | 0.0001555 |
| RPPH1-AluJ        | -0.226896921 | -0.31437392 | -1.394199e-01 | 0.0000000 |
| TERT-AluJ         | -0.012487044 | -0.09996404 | 7.498995e-02  | 0.9994945 |
| ValidPrime-AluJ   | -0.388182134 | -0.47565913 | -3.007051e-01 | 0.0000000 |
| GAPDH-ERV3        | 0.297475457  | 0.20999846  | 3.849525e-01  | 0.0000000 |
| NAGK-ERV3         | 0.299570765  | 0.21209377  | 3.870478e-01  | 0.0000000 |
| RPPH1-ERV3        | 0.209946266  | 0.12246927  | 2.974233e-01  | 0.0000000 |
| TERT-ERV3         | 0.424356143  | 0.33687915  | 5.118331e-01  | 0.0000000 |
| ValidPrime-ERV3   | 0.048661053  | -0.03881594 | 1.361380e-01  | 0.6339257 |
| NAGK-GAPDH        | 0.002095308  | -0.08538169 | 8.957230e-02  | 1.0000000 |
| RPPH1-GAPDH       | -0.087529191 | -0.17500619 | -5.219554e-05 | 0.0497604 |
| TERT-GAPDH        | 0.126880686  | 0.03940369  | 2.143577e-01  | 0.0006127 |
| ValidPrime-GAPDH  | -0.248814404 | -0.33629140 | -1.613374e-01 | 0.0000000 |
| RPPH1-NAGK        | -0.089624499 | -0.17710149 | -2.147504e-03 | 0.0409266 |
| TERT-NAGK         | 0.124785378  | 0.03730838  | 2.122624e-01  | 0.0008006 |
| ValidPrime-NAGK   | -0.250909712 | -0.33838671 | -1.634327e-01 | 0.0000000 |
| TERT-RNaseP       | 0.214409877  | 0.12693288  | 3.018869e-01  | 0.0000000 |
| ValidPrime-RNaseP | -0.161285213 | -0.24876221 | -7.380822e-02 | 0.0000051 |
| ValidPrime-TERT   | -0.375695090 | -0.46317208 | -2.882181e-01 | 0.0000000 |

## Supplementary Methods Appendix B – Model output (*cont.*)

### Experiment 25

Summary:

Call:

```
lm(formula = log10(Copies) ~ Ref.Gene + Donor + Run - 1, data = exp25)
```

Residuals:

| Min      | 1Q       | Median  | 3Q      | Max     |
|----------|----------|---------|---------|---------|
| -0.33372 | -0.05586 | 0.00699 | 0.06867 | 0.20622 |

Coefficients:

|                | Estimate | Std. Error | t value | Pr(> t ) |     |
|----------------|----------|------------|---------|----------|-----|
| Ref.GeneAluJ   | 3.32601  | 0.03630    | 91.616  | < 2e-16  | *** |
| Ref.GeneERV3   | 2.91469  | 0.03630    | 80.286  | < 2e-16  | *** |
| Ref.GeneRNaseP | 3.12760  | 0.03630    | 86.150  | < 2e-16  | *** |
| Ref.GeneTERT   | 3.27795  | 0.03630    | 90.292  | < 2e-16  | *** |
| DonorQX10      | -0.25318 | 0.04410    | -5.741  | 6.66e-08 | *** |
| DonorQX11      | -0.20816 | 0.04310    | -4.830  | 3.89e-06 | *** |
| DonorQX12      | -0.16510 | 0.04310    | -3.831  | 0.00020  | *** |
| DonorQX14      | -0.25001 | 0.04310    | -5.801  | 5.01e-08 | *** |
| DonorQX15      | -0.13927 | 0.04310    | -3.232  | 0.00157  | **  |
| DonorQX16      | -0.26688 | 0.04310    | -6.193  | 7.70e-09 | *** |
| DonorQX17      | -0.12060 | 0.04310    | -2.798  | 0.00594  | **  |
| DonorQX3       | -0.27213 | 0.04310    | -6.315  | 4.24e-09 | *** |
| DonorQX4       | -0.20139 | 0.04310    | -4.673  | 7.50e-06 | *** |
| DonorQX6       | -0.06018 | 0.04310    | -1.396  | 0.16506  |     |
| DonorQX7       | -0.26643 | 0.04310    | -6.182  | 8.10e-09 | *** |
| Run2           | 0.05658  | 0.02155    | 2.626   | 0.00972  | **  |
| Run3           | 0.01324  | 0.02167    | 0.611   | 0.54236  |     |

---

Signif. codes: 0 '\*\*\*' 0.001 '\*\*' 0.01 '\*' 0.05 '.' 0.1 ' ' 1

Residual standard error: 0.1056 on 126 degrees of freedom

(1 observation deleted due to missingness)

Multiple R-squared: 0.9989, Adjusted R-squared: 0.9988

F-statistic: 6824 on 17 and 126 DF, p-value: < 2.2e-16

Analysis of variance:

Analysis of Variance Table

Response: log10(Copies)

|           | Df  | Sum Sq  | Mean Sq | F value    | Pr(>F)    |     |
|-----------|-----|---------|---------|------------|-----------|-----|
| Ref.Gene  | 4   | 1291.53 | 322.88  | 28975.2155 | < 2.2e-16 | *** |
| Donor     | 11  | 1.04    | 0.09    | 8.4671     | 4.893e-11 | *** |
| Run       | 2   | 0.08    | 0.04    | 3.7668     | 0.02577   | *   |
| Residuals | 126 | 1.40    | 0.01    |            |           |     |



## Supplementary Methods Appendix B – Model output (*cont.*)

Signif. codes: 0 '\*\*\*' 0.001 '\*\*' 0.01 '\*' 0.05 '.' 0.1 ' ' 1

Tukey HSD:

Tukey multiple comparisons of means  
95% family-wise confidence level

Fit: aov(formula = log10(Copies) ~ Ref.Gene + Donor + Run, data = exp25)

\$Ref.Gene

|             | diff        | lwr         | upr         | p adj     |
|-------------|-------------|-------------|-------------|-----------|
| ERV3-AluJ   | -0.41131645 | -0.47609864 | -0.34653426 | 0.0000000 |
| RNaseP-AluJ | -0.19841123 | -0.26319342 | -0.13362904 | 0.0000000 |
| TERT-AluJ   | -0.04578585 | -0.11102913 | 0.01945743  | 0.2654870 |
| RNaseP-ERV3 | 0.21290522  | 0.14812303  | 0.27768741  | 0.0000000 |
| TERT-ERV3   | 0.36553059  | 0.30028731  | 0.43077387  | 0.0000000 |
| TERT-RNaseP | 0.15262537  | 0.08738209  | 0.21786865  | 0.0000001 |

## Experiment 32

Summary:

Call:

lm(formula = log10(Copies) ~ Ref.Gene + Donor - 1, data = exp32)

Residuals:

| Min       | 1Q        | Median    | 3Q       | Max      |
|-----------|-----------|-----------|----------|----------|
| -0.255085 | -0.041093 | -0.005247 | 0.028915 | 0.154534 |

Coefficients:

|                | Estimate | Std. Error | t value | Pr(> t ) |     |
|----------------|----------|------------|---------|----------|-----|
| Ref.GeneERV3   | 3.03262  | 0.04759    | 63.723  | < 2e-16  | *** |
| Ref.GeneRNaseP | 3.15455  | 0.04759    | 66.285  | < 2e-16  | *** |
| Ref.GeneTERT   | 3.22035  | 0.04759    | 67.668  | < 2e-16  | *** |
| DonorQX10      | -0.18830 | 0.06366    | -2.958  | 0.005783 | **  |
| DonorQX11      | -0.14544 | 0.06366    | -2.285  | 0.029117 | *   |
| DonorQX12      | -0.06056 | 0.06366    | -0.951  | 0.348619 |     |
| DonorQX13      | 0.07596  | 0.06366    | 1.193   | 0.241597 |     |
| DonorQX14      | -0.22528 | 0.06366    | -3.539  | 0.001254 | **  |
| DonorQX15      | -0.05918 | 0.06366    | -0.930  | 0.359564 |     |
| DonorQX16      | -0.21983 | 0.06366    | -3.453  | 0.001581 | **  |
| DonorQX17      | 0.01570  | 0.06366    | 0.247   | 0.806779 |     |
| DonorQX2       | 0.13336  | 0.06366    | 2.095   | 0.044187 | *   |
| DonorQX3       | -0.25861 | 0.06366    | -4.062  | 0.000294 | *** |
| DonorQX4       | -0.18050 | 0.06366    | -2.835  | 0.007870 | **  |
| DonorQX5       | 0.47707  | 0.06366    | 7.494   | 1.57e-08 | *** |

## Supplementary Methods Appendix B – Model output (*cont.*)

```
DonorQX6      -0.04491      0.06366     -0.705  0.485667
DonorQX7      -0.23704      0.06366     -3.723  0.000756 ***
DonorQX8      -0.26565      0.06366     -4.173  0.000215 ***
DonorQX9       0.20125      0.06366      3.161  0.003427 **
```

---

Signif. codes: 0 '\*\*\*' 0.001 '\*\*' 0.01 '\*' 0.05 '.' 0.1 ' ' 1

Residual standard error: 0.07797 on 32 degrees of freedom

Multiple R-squared: 0.9996, Adjusted R-squared: 0.9994

F-statistic: 4202 on 19 and 32 DF, p-value: < 2.2e-16

Analysis of variance:

Analysis of Variance Table

Response: log10(Copies)

|           | Df | Sum Sq | Mean Sq | F value   | Pr(>F)        |
|-----------|----|--------|---------|-----------|---------------|
| Ref.Gene  | 3  | 483.51 | 161.170 | 26511.181 | < 2.2e-16 *** |
| Donor     | 16 | 1.88   | 0.117   | 19.315    | 4.635e-12 *** |
| Residuals | 32 | 0.19   | 0.006   |           |               |

---

Signif. codes: 0 '\*\*\*' 0.001 '\*\*' 0.01 '\*' 0.05 '.' 0.1 ' ' 1

Tukey HSD:

Tukey multiple comparisons of means

95% family-wise confidence level

Fit: aov(formula = log10(Copies) ~ Ref.Gene + Donor, data = exp32)

\$Ref.Gene

|             | diff       | lwr          | upr       | p adj     |
|-------------|------------|--------------|-----------|-----------|
| RNaseP-ERV3 | 0.12193033 | 5.621158e-02 | 0.1876491 | 0.0002055 |
| TERT-ERV3   | 0.18773816 | 1.220194e-01 | 0.2534569 | 0.0000002 |
| TERT-RNaseP | 0.06580782 | 8.907612e-05 | 0.1315266 | 0.0496339 |

## Supplementary Data

cfDNA load in 12 donors based on 3 reference genes (TERT, RPPH1, ERV-3): mean values and 95% confidence intervals (Figure 7)

\*Standard errors are calculated based on ANOVA for each donor

|         |          | Natural log scale (copies/mL plasma) |          |          |                |                                                     |                 |                              |          |          | Linear copy number scale (copies/mL plasma) |          |          |                 |                 |
|---------|----------|--------------------------------------|----------|----------|----------------|-----------------------------------------------------|-----------------|------------------------------|----------|----------|---------------------------------------------|----------|----------|-----------------|-----------------|
|         | Donor ID | Exp 025a                             | Exp 025b | Exp 025c | Mean (TERT)    | Mean (3 reference genes)                            | Standard error* | 95% confidence interval (CI) | Upper CI | Lower CI | Mean (3 reference genes)                    | Upper CI | Lower CI | Upper error bar | Lower error bar |
|         | TERT     | 1                                    | 7.67     | 7.63     | 7.60           | 7.63                                                | 7.24            | 0.23                         | 1.00     | 8.24     | 6.24                                        | 1396     | 3788     | 515             | 2392            |
| 3       |          | 6.93                                 | 7.22     | 7.11     | 7.09           | 6.63                                                | 0.28            | 1.18                         | 7.82     | 5.45     | 760                                         | 2482     | 233      | 1722            | 527             |
| 4       |          | 7.16                                 | 7.13     | 7.14     | 7.14           | 6.76                                                | 0.30            | 1.28                         | 8.04     | 5.48     | 862                                         | 3103     | 239      | 2241            | 623             |
| 6       |          | 7.42                                 | 7.63     | 7.17     | 7.41           | 7.12                                                | 0.15            | 0.65                         | 7.78     | 6.47     | 1242                                        | 2385     | 647      | 1143            | 595             |
| 7       |          | 7.17                                 | 7.06     | 7.11     | 7.12           | 6.58                                                | 0.31            | 1.32                         | 7.90     | 5.27     | 723                                         | 2695     | 194      | 1972            | 529             |
| 10      |          | 7.20                                 | 6.75     |          | 6.97           | 6.58                                                | 0.25            | 1.08                         | 7.66     | 5.50     | 722                                         | 2129     | 245      | 1406            | 477             |
| 11      |          | 6.77                                 | 7.00     | 7.19     | 6.99           | 6.69                                                | 0.20            | 0.84                         | 7.54     | 5.85     | 806                                         | 1874     | 346      | 1068            | 459             |
| 12      |          | 7.42                                 | 7.51     | 7.16     | 7.36           | 6.77                                                | 0.31            | 1.32                         | 8.09     | 5.45     | 871                                         | 3250     | 233      | 2379            | 638             |
| 14      |          | 6.57                                 | 6.96     | 7.05     | 6.86           | 6.67                                                | 0.23            | 0.99                         | 7.66     | 5.69     | 792                                         | 2121     | 296      | 1329            | 496             |
| 15      |          | 7.18                                 | 7.21     | 7.31     | 7.24           | 6.89                                                | 0.21            | 0.92                         | 7.81     | 5.97     | 982                                         | 2453     | 393      | 1471            | 589             |
| 16      |          | 6.97                                 | 7.14     | 7.15     | 7.09           | 6.58                                                | 0.26            | 1.13                         | 7.71     | 5.45     | 718                                         | 2226     | 232      | 1507            | 486             |
| 17      |          | 6.98                                 | 7.23     | 7.54     | 7.25           | 6.88                                                | 0.27            | 1.15                         | 8.03     | 5.74     | 975                                         | 3073     | 310      | 2097            | 666             |
| RNase P | Donor ID | Exp 025a                             | Exp 025b | Exp 025c | Mean (RNase P) | <i>Average variation due to Reference gene 0.25</i> |                 |                              |          |          |                                             |          |          |                 |                 |
|         | 1        | 6.99                                 | 7.56     | 7.24     | 7.26           |                                                     |                 |                              |          |          |                                             |          |          |                 |                 |
|         | 3        | 6.88                                 | 7.18     | 5.98     | 6.68           |                                                     |                 |                              |          |          |                                             |          |          |                 |                 |
|         | 4        | 7.02                                 | 6.97     | 6.90     | 6.96           |                                                     |                 |                              |          |          |                                             |          |          |                 |                 |
|         | 6        | 7.09                                 | 7.07     | 7.08     | 7.08           |                                                     |                 |                              |          |          |                                             |          |          |                 |                 |
|         | 7        | 6.50                                 | 6.68     | 6.56     | 6.58           |                                                     |                 |                              |          |          |                                             |          |          |                 |                 |
|         | 10       | 6.59                                 | 7.09     | 6.45     | 6.71           |                                                     |                 |                              |          |          |                                             |          |          |                 |                 |
|         | 11       | 6.75                                 | 7.01     | 6.55     | 6.77           |                                                     |                 |                              |          |          |                                             |          |          |                 |                 |
|         | 12       | 6.47                                 | 6.92     | 6.44     | 6.61           |                                                     |                 |                              |          |          |                                             |          |          |                 |                 |
|         | 14       | 7.06                                 | 7.07     | 6.71     | 6.95           |                                                     |                 |                              |          |          |                                             |          |          |                 |                 |
|         | 15       | 6.79                                 | 7.04     | 6.97     | 6.93           |                                                     |                 |                              |          |          |                                             |          |          |                 |                 |
|         | 16       | 6.46                                 | 6.60     | 6.24     | 6.43           |                                                     |                 |                              |          |          |                                             |          |          |                 |                 |
| 17      | 6.76     | 7.43                                 | 6.91     | 7.03     |                |                                                     |                 |                              |          |          |                                             |          |          |                 |                 |

Supplementary Data (cont.)

| ERV-3 | Donor ID | Exp 025a | Exp 025b | Exp 025c | Mean (ERV-3) |
|-------|----------|----------|----------|----------|--------------|
|       | 1        | 6.76     | 7.03     | 6.70     | 6.83         |
|       | 3        | 5.81     | 6.52     | 6.08     | 6.14         |
|       | 4        | 6.48     | 6.12     | 5.92     | 6.17         |
|       | 6        | 6.72     | 6.89     | 7.05     | 6.89         |
|       | 7        | 6.00     | 5.92     | 6.24     | 6.06         |
|       | 10       | 6.22     | 6.30     | 5.68     | 6.07         |
|       | 11       | 6.18     | 6.57     | 6.21     | 6.32         |
|       | 12       | 6.57     | 6.09     | 6.36     | 6.34         |
|       | 14       | 6.47     | 5.72     | 6.47     | 6.22         |
|       | 15       | 6.57     | 6.27     | 6.66     | 6.50         |
|       | 16       | 6.50     | 6.51     | 5.62     | 6.21         |
| 17    | 5.85     | 6.33     | 6.91     | 6.37     |              |
